# Supplementary material for: The preparation and characterization of boehmite nanoparticles-TAPC: a tailored and reusable nanocatalyst for the synthesis of 12-aryl-8,9,10,12-tetrahydrobenzo[a]xanthen-11-ones
Source: Royal Society of Chemistry journal article supplement (doi:10.1039/c4nj01128g), 2014-01-01

# The preparation and characterization of boehmite nanoparticles-TAPC: A tailored and reusable nanocatalyst for the synthesis of 12-aryl-8,9,10,12-tetrahydrobenzo[*a*]xanthen-11-ones

Kiumars Bahrami,<sup>\*a, b</sup> Mohammad M. Khodaei,<sup>\*a</sup> and Mohsen Rostaie<sup>a</sup>

## Experimental

### General

All reagents were purchased from Merck and used without further purification. Boehmite nanoparticles and TAPC were prepared according to reported procedure respectively.<sup>1,2</sup> FT-IR spectra were obtained with potassium bromide pellets in the range 400–4000cm<sup>-1</sup> with a Perkin-Elmer 683 instrument. <sup>1</sup>H and <sup>13</sup>C NMR spectra were recorded on a Bruker (200 MHz) spectrometer in CDCl<sub>3</sub> as solvent. The morphology of boehmite nanoparticles and BNP-TAPC was examined by scanning electron microscopy (SEM, TESCAN VEGA TS 5136 MM) and transmission electron microscopy (TEM, Philips CM10, high tension 100 kV). X-ray powder diffraction (XRD) patterns were recorded using an EQUINOX 3000 Inel diffractometer with CuK $\alpha$  radiation ( $\lambda=1.5406 \text{ \AA}$ ).

### General procedure for the preparation of BNPs-TAPC

In a 100 ml round-bottom flask equipped and a magnetic stirrer bar, boehmite nanoparticles (50 mg), TAPC (50 mg) and CH<sub>2</sub>Cl<sub>2</sub> (20 mL) were mixed and sonicated for 1 h at 30° C and then the reaction mixture was refluxed at 40 °C for 12 h. Then, the solids were collected by filtration, washed thoroughly with CH<sub>2</sub>Cl<sub>2</sub> and dried at room temperature to afford a cream powder as the product.

### General procedure for the synthesis of 12-aryl-8,9,10,12-tetrahydrobenzo[*a*]xanthen-11-one derivatives with BNPs-TAPC

To a mixture of aldehyde (1.0 mmol),  $\beta$ -naphthol (1 mmol, 0.144 g), and 5,5-dimethylcyclohexane-1,3-dione (1.0 mmol), was added BNPs-TAPC (10 mg) and heated at 80 °C for an appropriate time (Table 3). The reaction was monitored by TLC. After completion of the reaction, ethanol was added the reaction mixture, and it was stirred for 5 min at 25 °C. The reaction mixture was filtered to remove the catalyst and the filtrate was poured into cold water. The solid was suction filtered, washed with cold water (20 mL  $\times$  2) to afford pure product. The spectral and physical properties of known products were compared with those reported in the literature. In every case excellent agreement was obtained. <sup>1</sup>H and <sup>13</sup>C NMR spectra for some compound follow.

1. L. Rajabi and A. A. Derakhshan, *Sci. Adv. Mater.*, 2010, **2**, 163.

2. R. Steinman, F. B. Jr. Schirmer and L. F. Audrieth, *J. Am. Chem. Soc.*, 1942, **64**, 2377.

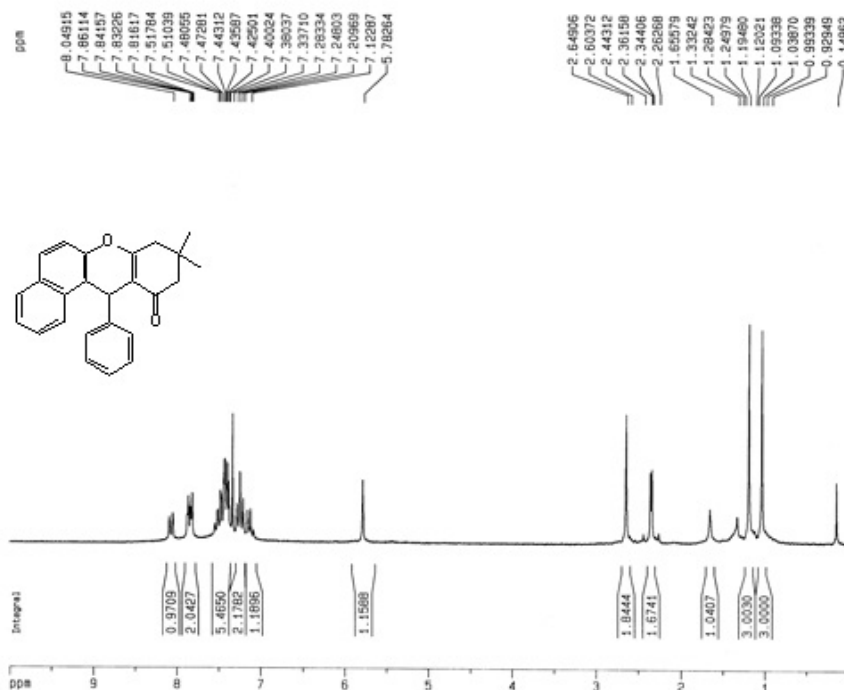

Current Data Parameters  
 NAME 1H  
 EXPNO 35  
 PROCNO 1  
 F2 - Acquisition Parameters  
 Date\_ 20110809  
 Time 10.10  
 INSTRUM spect  
 PROBD 5 mm DUL 13C-  
 PULPROG zg30  
 TD 65536  
 SOLVENT CDCl3  
 NS 13  
 DS 0  
 SMH 4139.073 Hz  
 FIDRES 0.063157 Hz  
 AQ 7.5167866 sec  
 RG 1448.0  
 DM 120.800 usec  
 DE 6.00 usec  
 TE 300.0 K  
 D1 1.00000000 sec

----- CHANNEL f1 -----  
 NUC1 1H  
 P1 8.80 usec  
 PL1 -3.00 dB  
 SFO1 200.1312359 MHz  
 F2 - Processing parameters  
 SI 32768  
 SF 200.1299930 MHz  
 KW EM  
 SSB 0  
 LB 0.30 Hz  
 GB 0  
 PC 1.00  
 1D NMR plot parameters  
 CX 20.00 cm  
 FIP 10.000 ppm  
 F1 2001.30 Hz  
 F2P 0.000 ppm  
 F2 0.00 Hz  
 PPMCM 0.50000 ppm/cm  
 HZCM 100.05499 Hz/cm

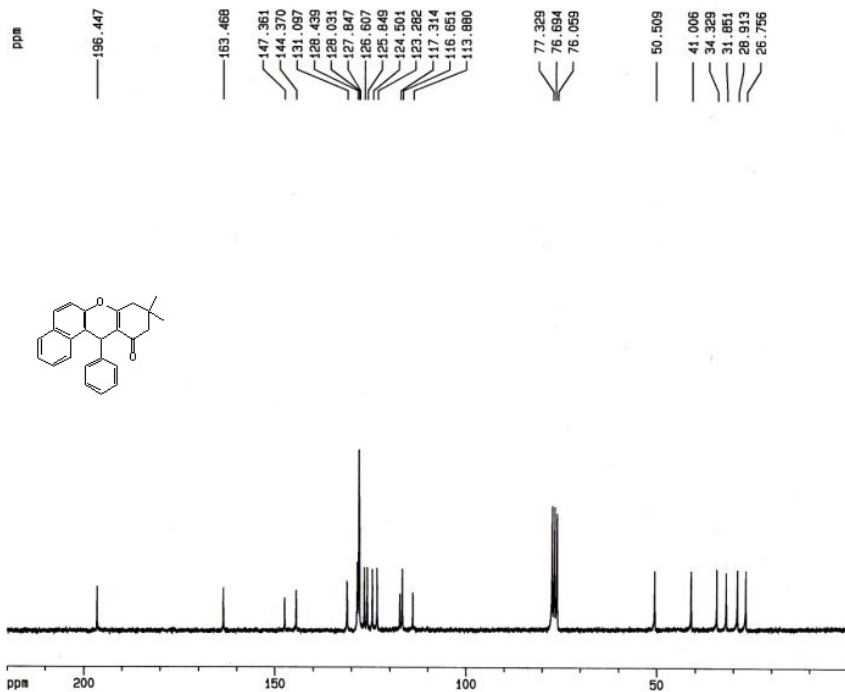

Current Data Parameters  
 NAME carbon  
 EXPNO 121  
 PROCNO 1  
 F2 - Acquisition Parameters  
 Date\_ 20110809  
 Time 15.31  
 INSTRUM spect  
 PROBD 5 mm DUL 13C-  
 PULPROG zgpg30  
 TD 65536  
 SOLVENT CDCl3  
 NS 5000  
 DS 0  
 SMH 12562.814 Hz  
 FIDRES 0.191693 Hz  
 AQ 2.6083827 sec  
 RG 32000  
 DM 39.800 usec  
 DE 6.00 usec  
 TE 300.0 K  
 D1 2.00000000 sec  
 D11 0.03000000 sec  
 D12 0.00002000 sec

----- CHANNEL f1 -----  
 NUC1 13C  
 P1 10.30 usec  
 PL1 0.00 dB  
 SFO1 50.3282440 MHz  
 ----- CHANNEL f2 -----  
 CPDPRG2 waltz16  
 NUC2 1H  
 P2P2 80.00 usec  
 PL2 -3.00 dB  
 PL12 20.00 dB  
 PL13 20.00 dB  
 SFO2 200.1308005 MHz  
 F2 - Processing parameters  
 SI 32768  
 SF 50.3227509 MHz  
 KW EM  
 SSB 0  
 LB 1.00 Hz  
 GB 0  
 PC 1.40  
 1D NMR plot parameters  
 CX 20.00 cm  
 FIP 220.000 ppm  
 F1 11071.00 Hz  
 F2P 0.000 ppm  
 F2 0.00 Hz  
 PPMCM 11.00000 ppm/cm  
 HZCM 553.55023 Hz/cm

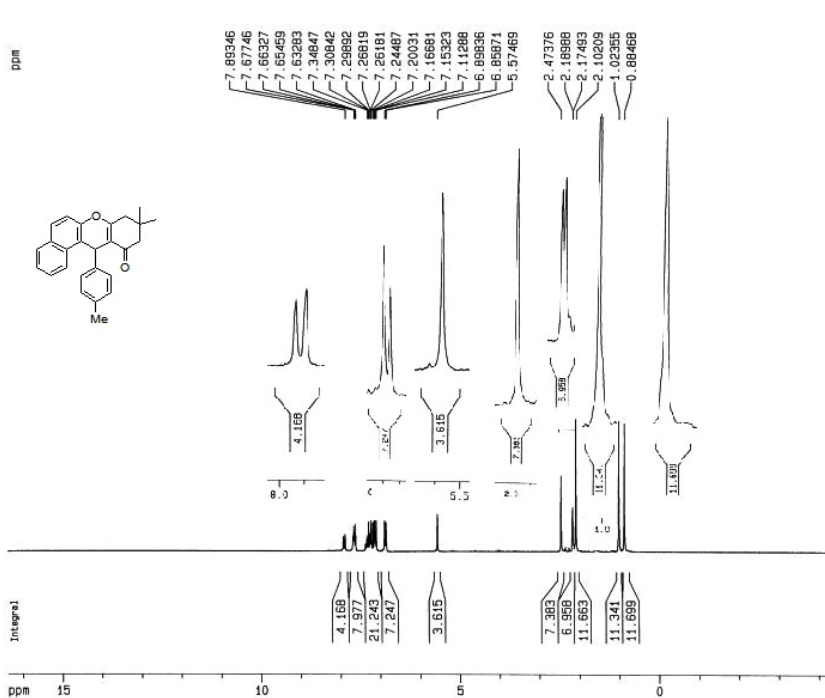

Current Data Parameters  
 NAME 1H  
 EXPNO 74  
 PROCNO 1

F2 - Acquisition Parameters  
 Date\_ 20110616  
 Time 9.52  
 INSTRUM spect  
 PROBHD 5 mm DUL 13C-  
 PULPROG zg30  
 TD 65536  
 SOLVENT CDCl3  
 NS 12  
 OS 0  
 SMH 4139.073 Hz  
 FIDRES 0.063157 Hz  
 AQ 7.9167585 sec  
 RG 1024  
 DM 120.800 usec  
 DE 6.00 usec  
 TE 300.0 K  
 D1 1.0000000 sec

----- CHANNEL f1 -----  
 NUC1 1H  
 P1 8.80 usec  
 PL1 -3.00 dB  
 SFO1 200.1312359 MHz

F2 - Processing parameters  
 SI 32768  
 SF 200.1300273 MHz  
 MDW EM  
 SSB 0  
 LB 0.30 Hz  
 GB 0  
 PC 1.00

1D NMR plot parameters  
 CX 20.00 cm  
 F1P 16.380 ppm  
 F1 3278.11 Hz  
 F2P -4.302 ppm  
 F2 -860.96 Hz  
 FWHM 1.03410 ppm/cm  
 HZCM 206.95363 Hz/cm

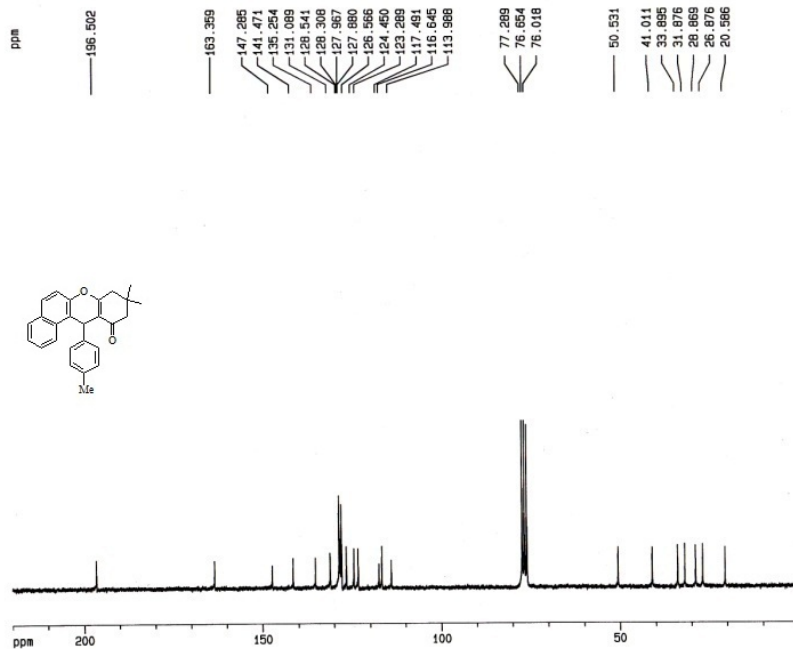

Current Data Parameters  
 NAME carbon  
 EXPNO 127  
 PROCNO 1

F2 - Acquisition Parameters  
 Date\_ 20110616  
 Time 17.45  
 INSTRUM spect  
 PROBHD 5 mm DUL 13C-  
 PULPROG zgpg30  
 TD 65536  
 SOLVENT CDCl3  
 NS 5000  
 OS 0  
 SMH 12562.814 Hz  
 FIDRES 0.181883 Hz  
 AQ 2.6083827 sec  
 RG 30000  
 DM 39.800 usec  
 DE 6.00 usec  
 TE 300.0 K  
 D1 2.0000000 sec  
 D11 0.0300000 sec  
 D12 0.0000000 sec

----- CHANNEL f1 -----  
 NUC1 13C  
 P1 10.30 usec  
 PL1 0.00 dB  
 SFO1 50.3282440 MHz

----- CHANNEL f2 -----  
 CPDPRG2 waltz16  
 NUC2 1H  
 P2 80.00 usec  
 PL2 -3.00 dB  
 PL12 20.00 dB  
 PL13 20.00 dB  
 SFO2 200.1300005 MHz

F2 - Processing parameters  
 SI 32768  
 SF 50.3227509 MHz  
 MDW EM  
 SSB 0  
 LB 1.00 Hz  
 GB 0  
 PC 1.40

1D NMR plot parameters  
 CX 20.00 cm  
 F1P 220.000 ppm  
 F1 11871.00 Hz  
 F2P 0.000 ppm  
 F2 0.00 Hz  
 FWHM 11.00000 ppm/cm  
 HZCM 563.59023 Hz/cm

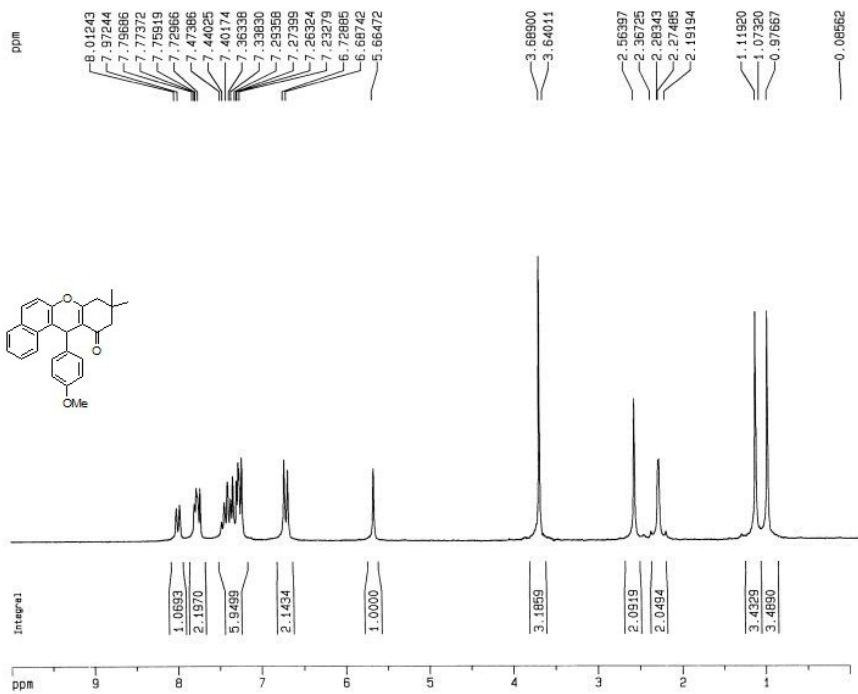

Current Data Parameters  
 NAME proton  
 EXPNO 57  
 PROCNO 1

F2 - Acquisition Parameters  
 Date\_ 20110704  
 Time 8.21  
 INSTRUM spect  
 PROBHD 5 mm DUL 13C-  
 PULPROG zg30  
 TD 65536  
 SOLVENT CDCl3  
 NS 12  
 DS 0  
 SMH 4139.073 Hz  
 FIDRES 0.063157 Hz  
 AQ 7.9167996 sec  
 RG 812.7  
 DM 120.800 usec  
 DE 6.00 usec  
 TE 300.0 K  
 D1 1.00000000 sec

----- CHANNEL f1 -----  
 NUC1 1H  
 P1 8.80 usec  
 PL1 -3.00 dB  
 SFO1 200.1312359 MHz

F2 - Processing parameters  
 SI 32768  
 SF 200.1300080 MHz  
 MDW EM  
 SSB 0  
 LB 0.30 Hz  
 GB 0  
 PC 1.00

1D NMR plot parameters  
 CX 20.00 cm  
 F1P 10.000 ppm  
 F1 2001.30 Hz  
 F2P 0.000 ppm  
 F2 0.00 Hz  
 PPMCH 0.50000 ppm/cm  
 HZCM 100.06500 Hz/cm

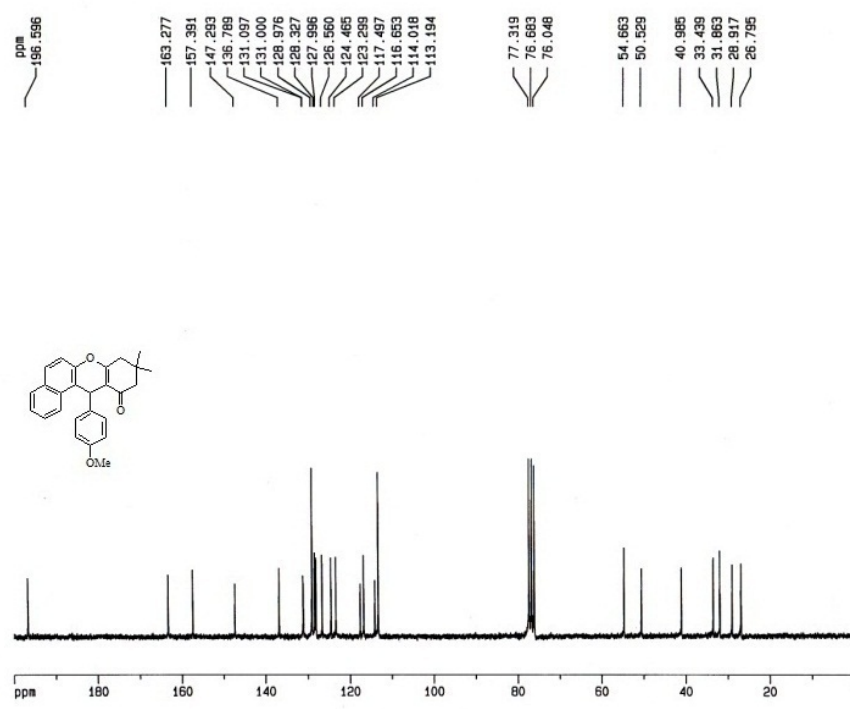

Current Data Parameters  
 NAME carbon  
 EXPNO 120  
 PROCNO 1

F2 - Acquisition Parameters  
 Date\_ 20110909  
 Time 7.26  
 INSTRUM spect  
 PROBHD 5 mm DUL 13C-  
 PULPROG zgpg30  
 TD 65536  
 SOLVENT CDCl3  
 NS 2222  
 DS 0  
 SMH 12562.814 Hz  
 FIDRES 0.191693 Hz  
 AQ 2.6083827 sec  
 RG 32000  
 DM 39.800 usec  
 DE 6.00 usec  
 TE 300.0 K  
 D1 2.00000000 sec  
 D11 0.03000000 sec  
 D12 0.00012000 sec

----- CHANNEL f1 -----  
 NUC1 13C  
 P1 10.30 usec  
 PL1 0.00 dB  
 SFO1 50.3282440 MHz

----- CHANNEL f2 -----  
 CPDPRG2 waltz16  
 NUC2 1H  
 P2P2 80.00 usec  
 PL2 -3.00 dB  
 PL12 20.00 dB  
 PL13 20.00 dB  
 SFO2 200.1308005 MHz

F2 - Processing parameters  
 SI 32768  
 SF 50.3227509 MHz  
 MDW EM  
 SSB 0  
 LB 1.00 Hz  
 GB 0  
 PC 1.40

1D NMR plot parameters  
 CX 20.00 cm  
 F1P 200.000 ppm  
 F1 10064.35 Hz  
 F2P 0.000 ppm  
 F2 0.00 Hz  
 PPMCH 10.00000 ppm/cm  
 HZCM 503.22751 Hz/cm

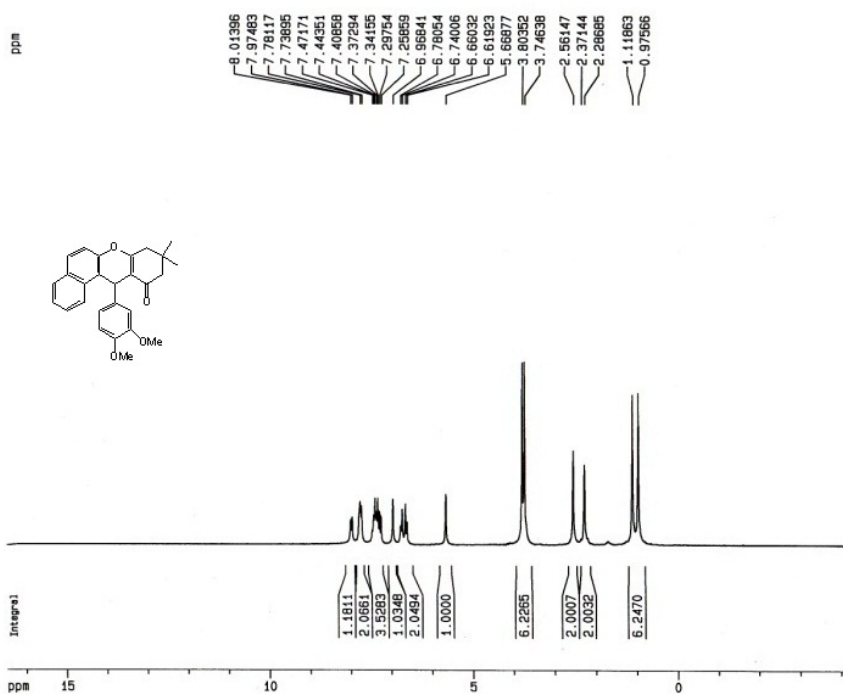

Current Data Parameters  
 NAME 1H  
 EXPNO 110  
 PROCNO 1

F2 - Acquisition Parameters  
 Date\_ 20110731  
 Time 3.11  
 INSTRUM spect  
 PROBHD 5 mm DUL 13C-  
 PULPROG zg30  
 TD 65636  
 SOLVENT CDCl3  
 NS 12  
 DS 0  
 SMH 4139.073 Hz  
 FIDRES 0.063157 Hz  
 AQ 7.9167986 sec  
 RG 574.7  
 DM 120.800 usec  
 DE 6.00 usec  
 TE 300.0 K  
 D1 1.00000000 sec

CHANNEL f1  
 NUC1 1H  
 P1 8.80 usec  
 PL1 -3.00 dB  
 SFO1 200.1312359 MHz

F2 - Processing parameters  
 SI 32768  
 SF 200.1300064 MHz  
 MDW EM  
 SSB 0  
 LB 0.30 Hz  
 GB 0  
 PC 1.00

1D NMR plot parameters  
 CX 20.00 cm  
 F1P 16.474 ppm  
 F1 3297.01 Hz  
 F2P -4.208 ppm  
 F2 -842.06 Hz  
 PPMCH 1.03410 ppm/cm  
 HZCM 206.95364 Hz/cm

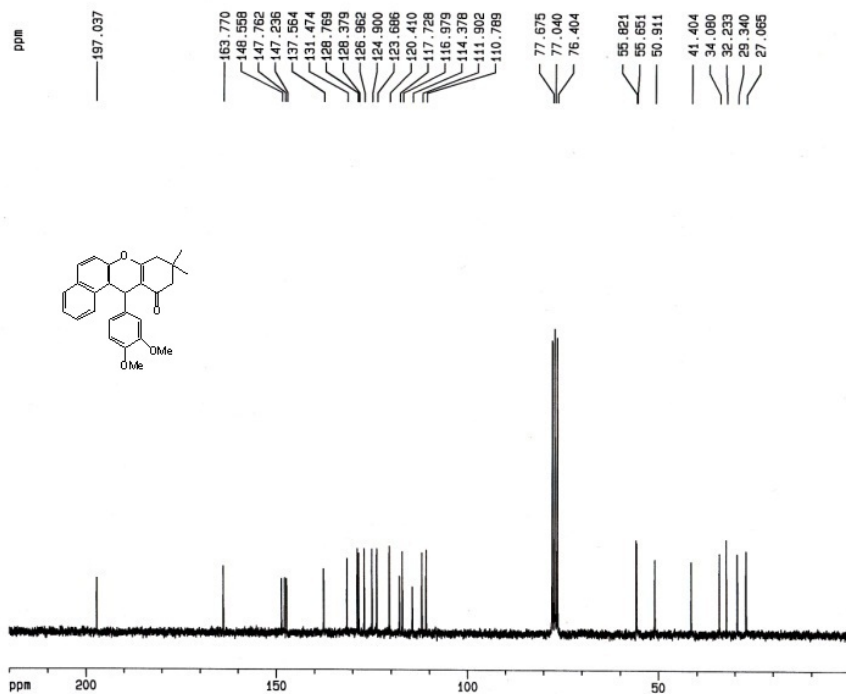

Current Data Parameters  
 NAME Carbon-13C  
 EXPNO 28  
 PROCNO 1

F2 - Acquisition Parameters  
 Date\_ 20110731  
 Time 6.41  
 INSTRUM spect  
 PROBHD 5 mm DUL 13C-  
 PULPROG zgpg30  
 TD 65636  
 SOLVENT CDCl3  
 NS 1437  
 DS 0  
 SMH 12562.814 Hz  
 FIDRES 0.191693 Hz  
 AQ 2.6083827 sec  
 RG 32000  
 DM 39.800 usec  
 DE 6.00 usec  
 TE 300.0 K  
 D1 2.00000000 sec  
 D11 0.03000000 sec  
 D12 0.00002000 sec

CHANNEL f1  
 NUC1 13C  
 P1 10.30 usec  
 PL1 0.00 dB  
 SFO1 50.3282440 MHz

CHANNEL f2  
 CHPROG2 waltz16  
 NUC2 1H  
 PCPD2 80.00 usec  
 PL2 -3.00 dB  
 PL12 20.00 dB  
 PL13 20.00 dB  
 SFO2 200.1308005 MHz

F2 - Processing parameters  
 SI 32768  
 SF 50.3227310 MHz  
 MDW EM  
 SSB 0  
 LB 1.00 Hz  
 GB 0  
 PC 1.40

1D NMR plot parameters  
 CX 20.00 cm  
 F1P 220.000 ppm  
 F1 11071.00 Hz  
 F2P 0.000 ppm  
 F2 0.00 Hz  
 PPMCH 11.00000 ppm/cm  
 HZCM 553.55005 Hz/cm

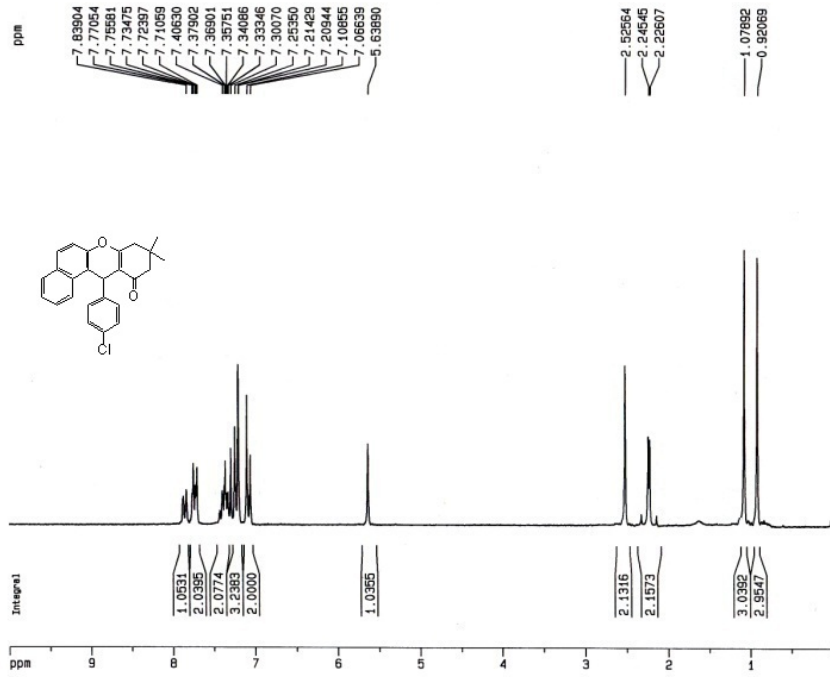

Current Data Parameters  
 NAME proton  
 EXPNO 5  
 PROCNO 1

F2 - Acquisition Parameters  
 Date\_ 20110803  
 Time 5.16  
 INSTRUM spect  
 PROBHD 5 mm DUL 13C-  
 PULPROG zg30  
 TD 65536  
 SOLVENT CDC13  
 NS 12  
 DS 0  
 SMH 4139.073 Hz  
 FIDRES 0.063157 Hz  
 AQ 7.9167996 sec  
 RG 1149.4  
 DM 120.800 usec  
 DE 6.00 usec  
 TE 300.0 K  
 D1 1.00000000 sec

----- CHANNEL f1 -----  
 NUC1 1H  
 P1 8.80 usec  
 PL1 -3.00 dB  
 SFO1 200.1312359 MHz

F2 - Processing parameters  
 SI 32768  
 SF 200.1300173 MHz  
 MDW EM  
 SSB 0  
 LB 0.30 Hz  
 GB 0  
 PC 1.00

ID NMR plot parameters  
 CX 20.00 cm  
 F1P 10.000 ppm  
 F1 2001.30 Hz  
 F2P 0.000 ppm  
 F2 0.00 Hz  
 PRNCH 0.50000 ppm/cm  
 HZCM 100.05501 Hz/cm

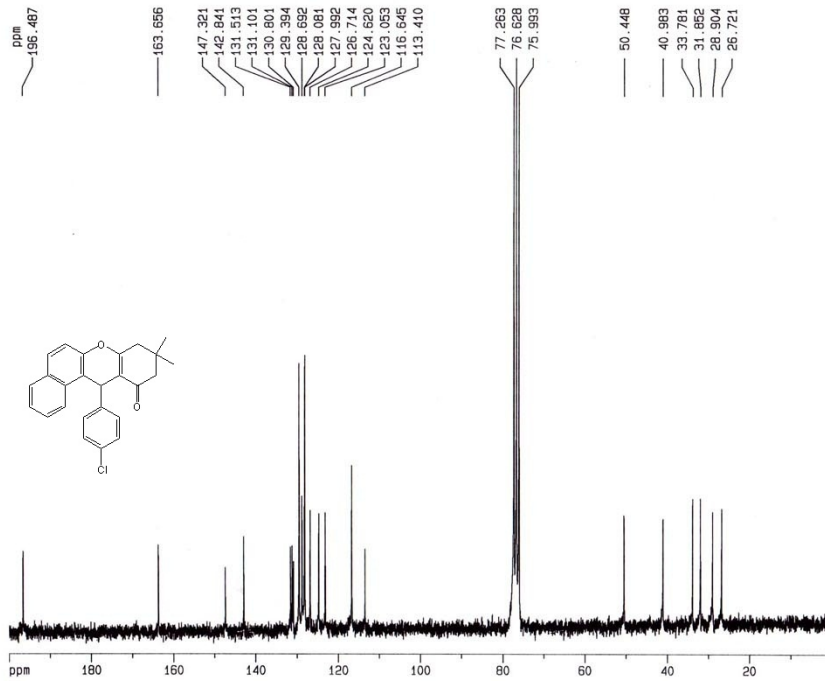

Current Data Parameters  
 NAME 13C  
 EXPNO 5  
 PROCNO 1

F2 - Acquisition Parameters  
 Date\_ 20110912  
 Time 9.46  
 INSTRUM spect  
 PROBHD 5 mm DUL 13C-  
 PULPROG zgpg30  
 TD 65536  
 SOLVENT CDC13  
 NS 5000  
 DS 0  
 SMH 12562.814 Hz  
 FIDRES 0.191693 Hz  
 AQ 2.6083827 sec  
 RG 32000  
 DM 99.800 usec  
 DE 6.00 usec  
 TE 300.0 K  
 D1 2.00000000 sec  
 D11 0.33000000 sec  
 D12 0.00020000 sec

----- CHANNEL f1 -----  
 NUC1 13C  
 P1 10.30 usec  
 PL1 0.00 dB  
 SFO1 50.3282440 MHz

----- CHANNEL f2 -----  
 CPDPRG2 waltz16  
 NUC2 1H  
 P2P2 80.00 usec  
 PL2 -3.00 dB  
 PL12 20.00 dB  
 PL13 20.00 dB  
 SFO2 200.1309005 MHz

F2 - Processing parameters  
 SI 32768  
 SF 50.3227509 MHz  
 MDW EM  
 SSB 0  
 LB 1.00 Hz  
 GB 0  
 PC 1.40

ID NMR plot parameters  
 CX 20.00 cm  
 F1P 200.000 ppm  
 F1 10064.55 Hz  
 F2P 0.000 ppm  
 F2 0.00 Hz  
 PRNCH 10.00000 ppm/cm  
 HZCM 503.22751 Hz/cm

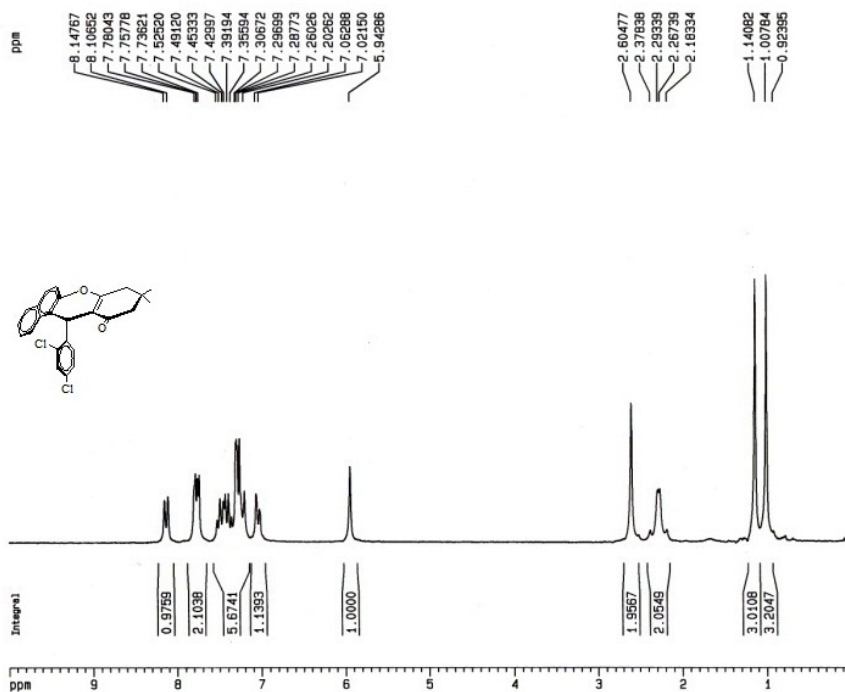

Current Data Parameters  
 NAME 1H  
 EXPNO 116  
 PROCNO 1

F2 - Acquisition Parameters  
 Date\_ 20110731  
 Time 4.37  
 INSTRUM spect  
 PROBHD 5 mm DUL 13C-  
 PULPROG zg30  
 TD 65536  
 SOLVENT CDCl3  
 NS 12  
 DS 0  
 SMH 4139.073 Hz  
 FIDRES 0.083157 Hz  
 AQ 7.9167986 sec  
 RG 645.1  
 DM 120.800 usec  
 DE 5.00 usec  
 TE 300.0 K  
 D1 1.00000000 sec

CHANNEL f1  
 NUC1 1H  
 P1 8.00 usec  
 PL1 -3.00 dB  
 SFO1 200.1312359 MHz

F2 - Processing parameters  
 SI 32768  
 SF 200.1300064 MHz  
 MH EM  
 SSB 0  
 LB 0.30 Hz  
 GB 0  
 PC 1.00

ID NMR plot parameters  
 CX 20.00 cm  
 F1P 10.000 ppm  
 F1 2001.30 Hz  
 F2P 0.000 ppm  
 F2 0.00 Hz  
 PRNCH 0.50000 ppm/cm  
 HZCH 100.05500 Hz/cm

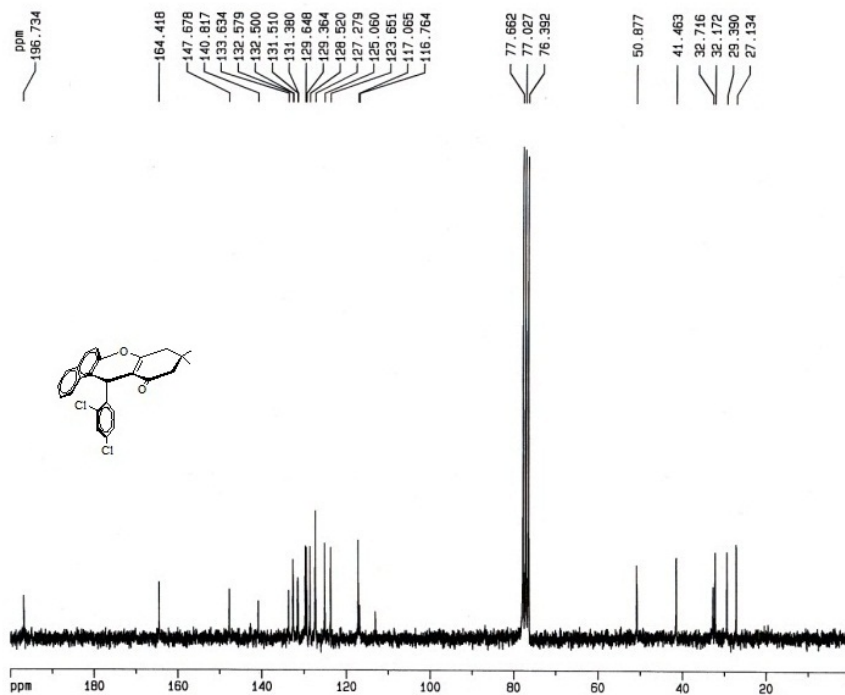

Current Data Parameters  
 NAME Carbon-13C  
 EXPNO 36  
 PROCNO 1

F2 - Acquisition Parameters  
 Date\_ 20110802  
 Time 5.14  
 INSTRUM spect  
 PROBHD 5 mm DUL 13C-  
 PULPROG zgpg30  
 TD 65536  
 SOLVENT CDCl3  
 NS 1988  
 DS 0  
 SMH 12562.814 Hz  
 FIDRES 0.191693 Hz  
 AQ 2.5083827 sec  
 RG 32000  
 DM 39.800 usec  
 DE 6.00 usec  
 TE 300.0 K  
 D1 2.00000000 sec  
 D11 0.03000000 sec  
 D12 0.00002000 sec

CHANNEL f1  
 NUC1 13C  
 P1 10.30 usec  
 PL1 0.00 dB  
 SFO1 50.3282440 MHz

CHANNEL f2  
 CPDPRG2 waltz16  
 NUC2 1H  
 PCDPRG2 80.00 usec  
 PL2 -3.00 dB  
 PL12 20.00 dB  
 PL13 20.00 dB  
 SFO2 200.1308005 MHz

F2 - Processing parameters  
 SI 32768  
 SF 50.3227310 MHz  
 MH EM  
 SSB 0  
 LB 1.00 Hz  
 GB 0  
 PC 1.40

ID NMR plot parameters  
 CX 20.00 cm  
 F1P 200.000 ppm  
 F1 10054.95 Hz  
 F2P 0.000 ppm  
 F2 0.00 Hz  
 PRNCH 10.00000 ppm/cm  
 HZCH 503.22729 Hz/cm



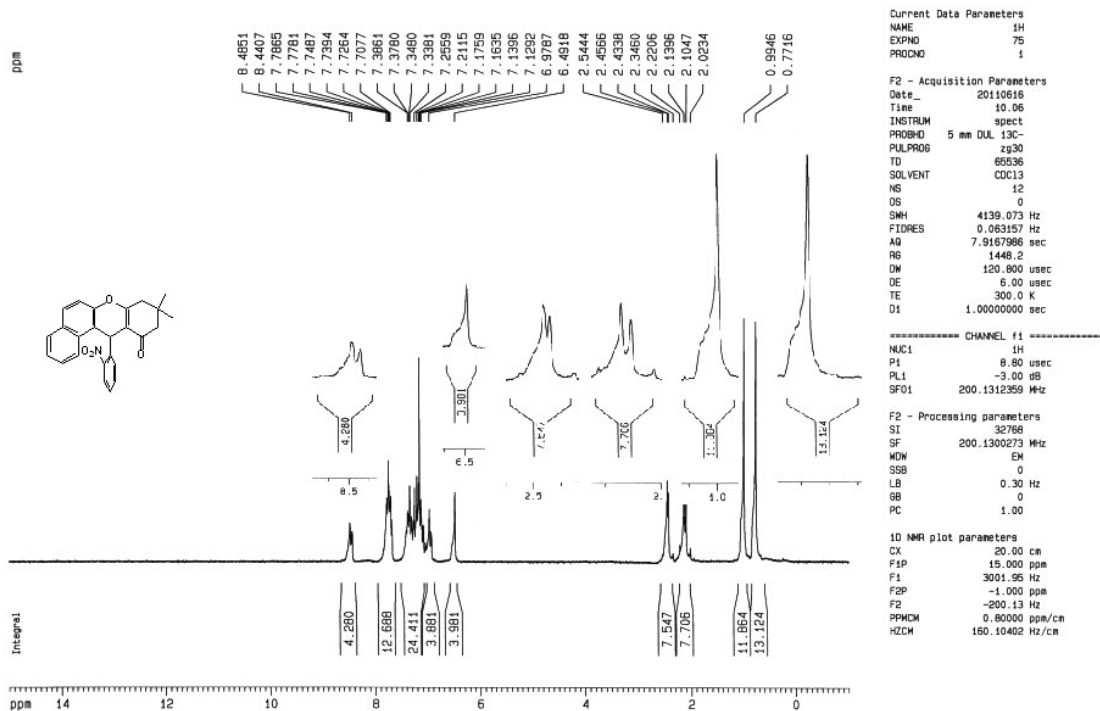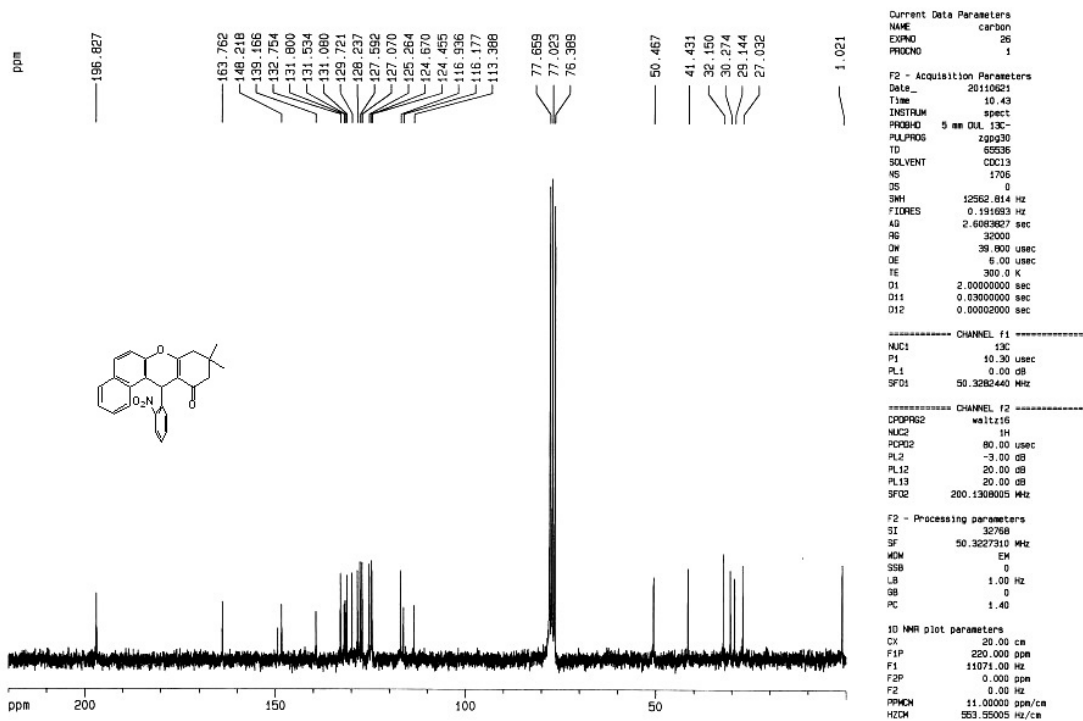

Supplement: c4nj01128g1.pdf [file c4nj01128g1.pdf]
